# Supplementary material for: Exploring neuronal mechanisms involved in the scratching behavior of a mouse model of allergic contact dermatitis by transcriptomics
Source: PubMed Central journal article supplement (PMC8903649; doi:10.1186/s11658-022-00316-w), 2022-02-19

**A**

Up-regulated DEGs

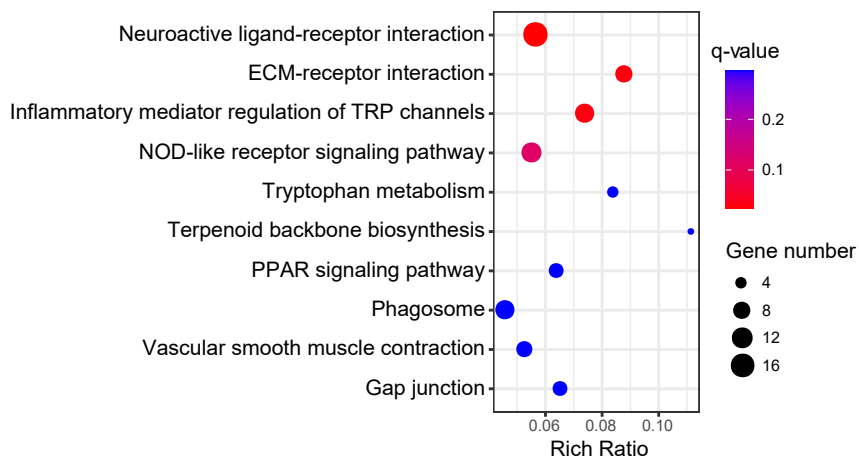

**B**

Down-regulated DEGs

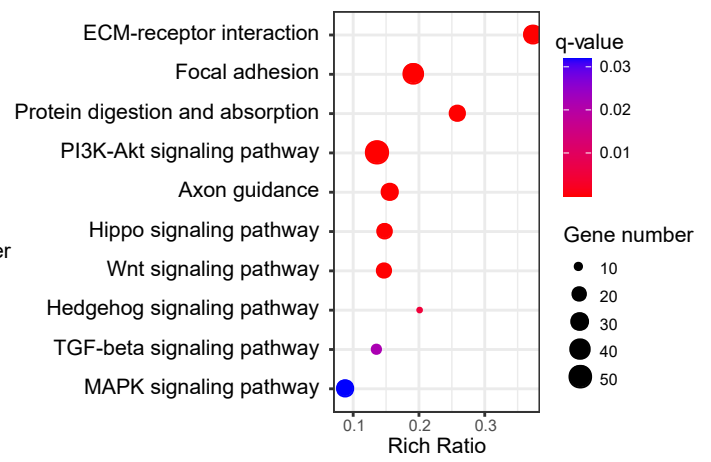

Supplement: 11658_2022_316_MOESM7_ESM.pdf [file 11658_2022_316_MOESM7_ESM.pdf]
