# Supplementary material for: Exploring neuronal mechanisms involved in the scratching behavior of a mouse model of allergic contact dermatitis by transcriptomics
Source: PubMed Central journal article supplement (PMC8903649; doi:10.1186/s11658-022-00316-w), 2022-02-19

● mRNA  
◆ lncRNA

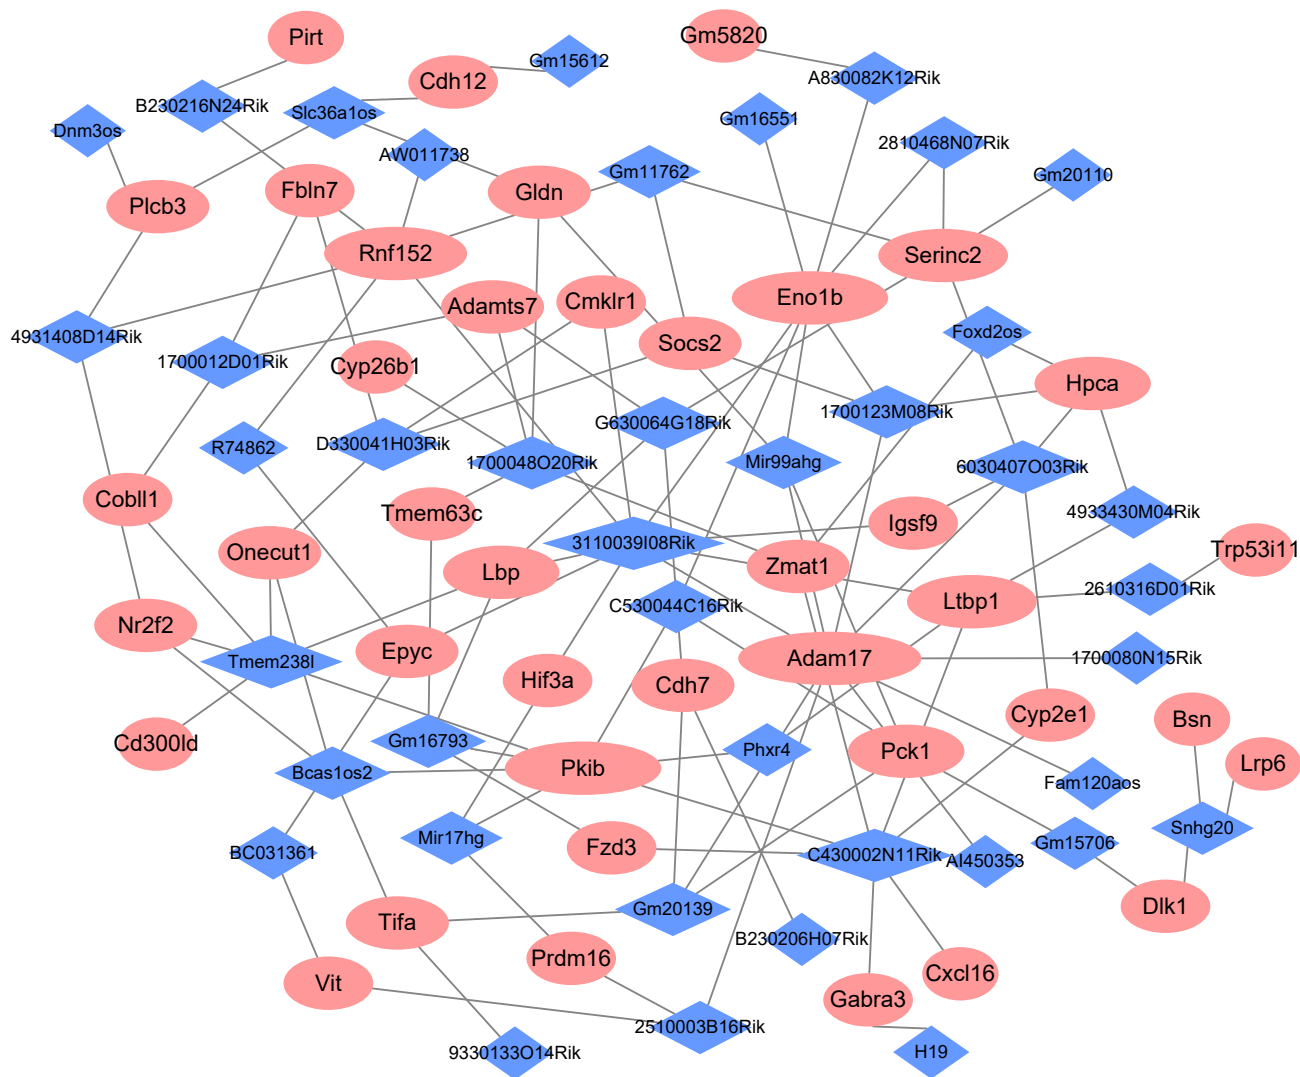

Supplement: 11658_2022_316_MOESM11_ESM.pdf [file 11658_2022_316_MOESM11_ESM.pdf]
